# Supplementary material for: 39. 乳幼児における先天性水腎症の 2 例(第 3 回九州小児外科学会)
Source: JCI journal article supplement (doi:10.1172/jci94687), 1967-01-01
Supplement: sd1 [file 1]

## Supplementary Materials and Methods

### QRT-PCR

Mouse bone marrow endothelial cells were treated by G-CSF, G-CSF plus diprotin A, G-CSF plus diprotin A with NPY or G-CSF plus diprotin A with NPY<sub>3-36</sub>. Total RNA isolated from above treated cells was used for quantitative RT-PCR using Power SYBR Green PCR mix (Applied Biosystems Inc, Foster City, CA, USA). Primers for the RT-PCR experiments are as previous described (1). Difference in mRNA were calculated using the  $\Delta$ CT method and were normalized to GAPDH.

### Reference List

1. Li,J., Qu,X., Yao,J., Caruana,G., Ricardo,S.D., Yamamoto,Y., Yamamoto,H., and Bertram,J.F. 2010. Blockade of endothelial-mesenchymal transition by a Smad3 inhibitor delays the early development of streptozotocin-induced diabetic nephropathy. *Diabetes* 59:2612-2624.

**A**

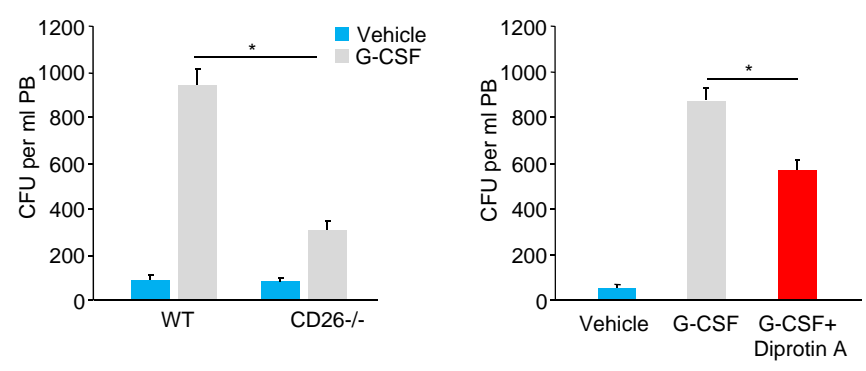

**B**

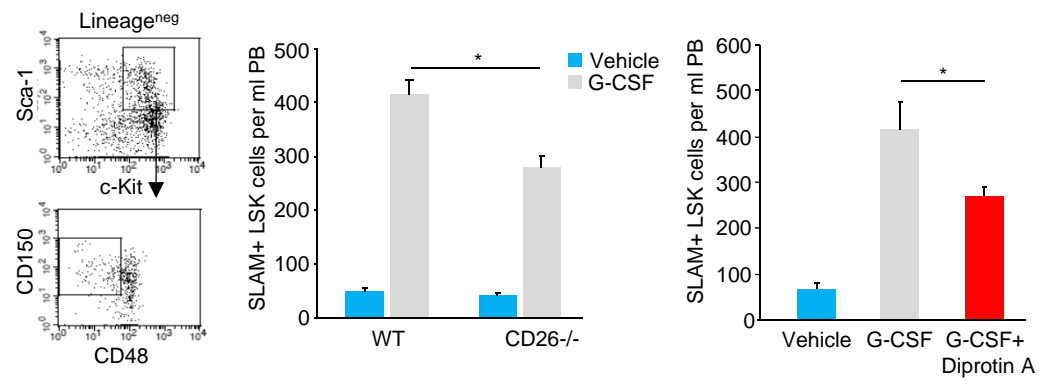

**C**

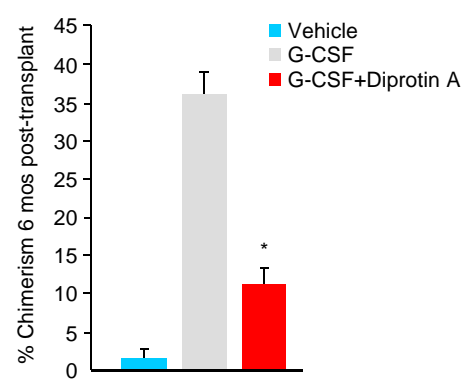

**D**

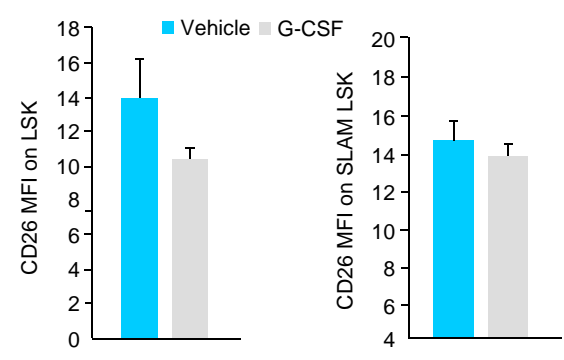

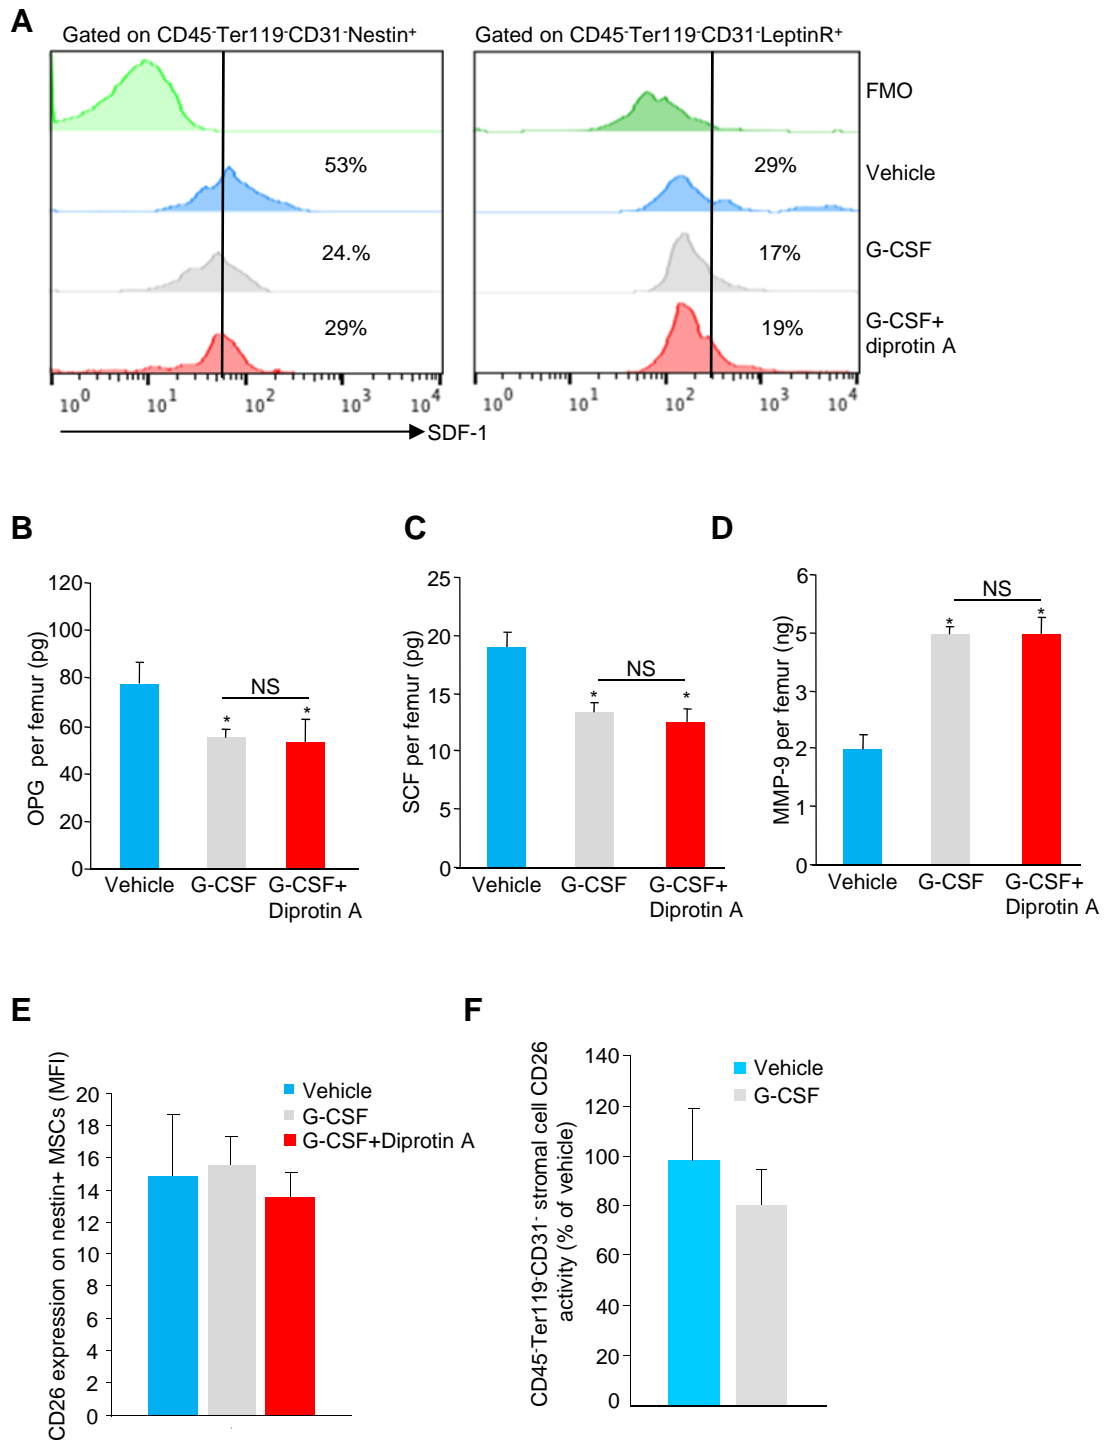

Supplemental  
Figure 3

**A**

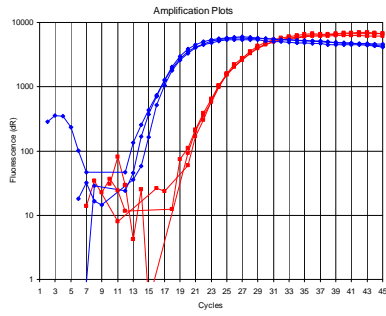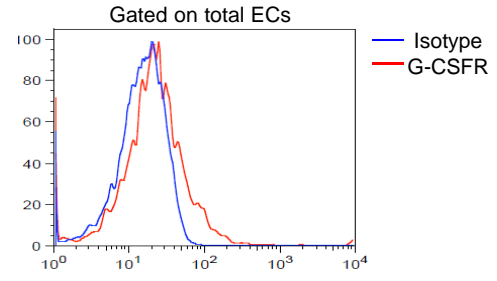

**B**

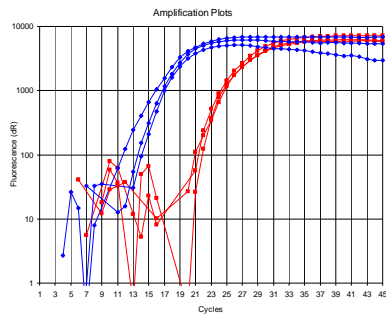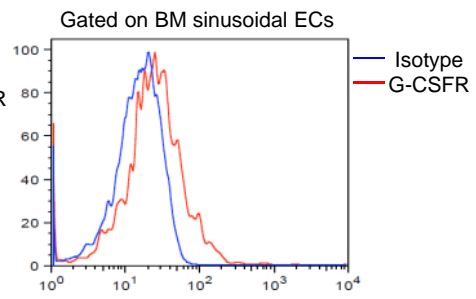

Supplemental  
Figure 4

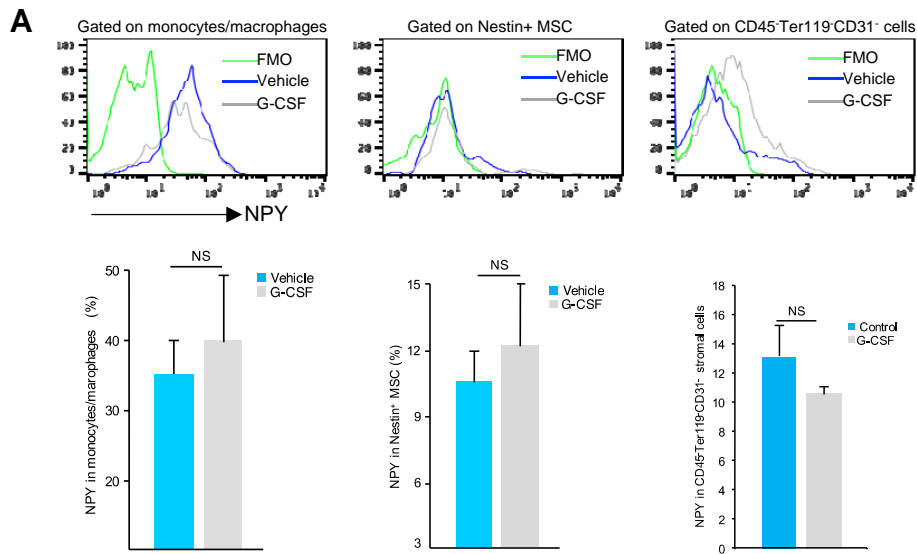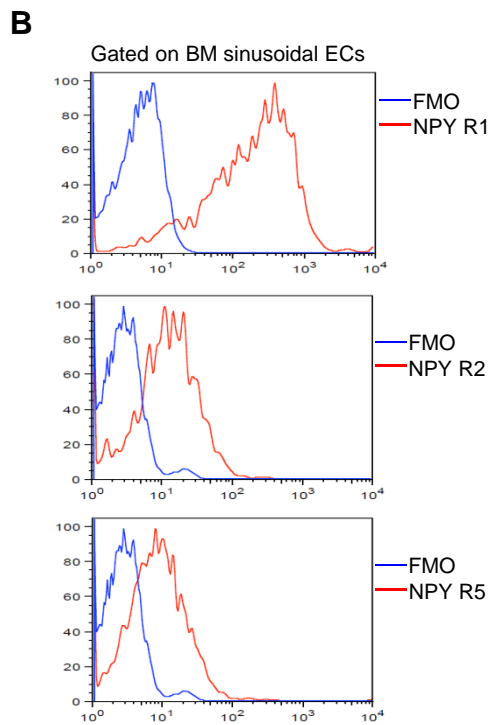

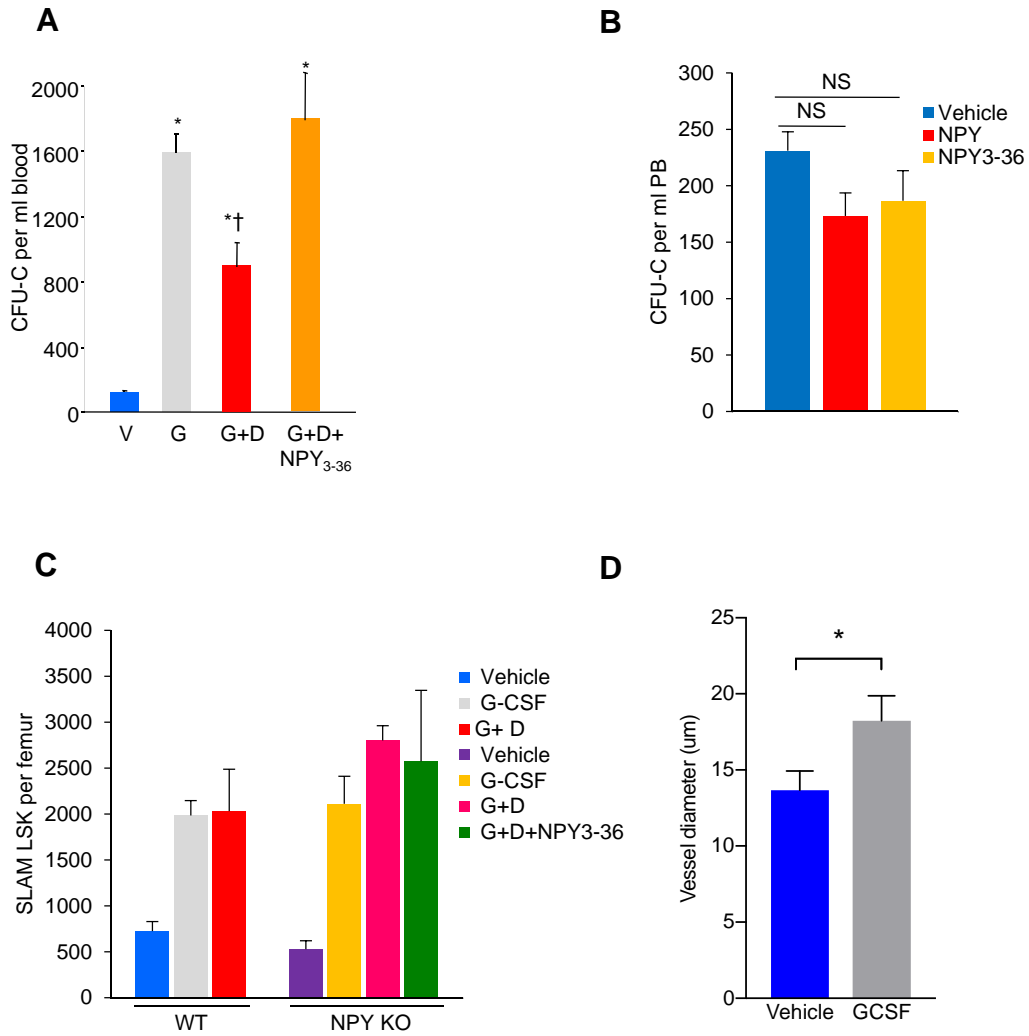

Supplemental  
Figure 6

**A**

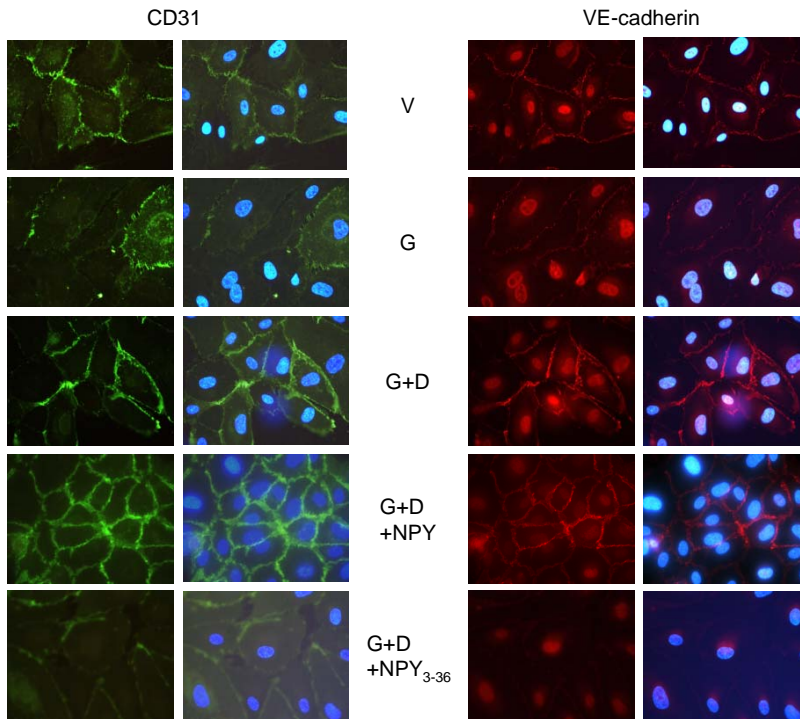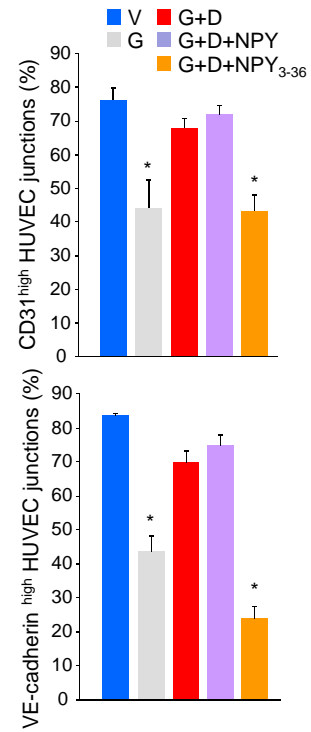

**B**

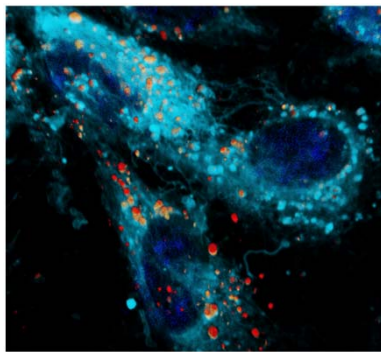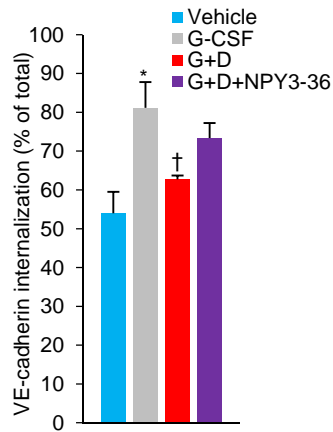

**C**

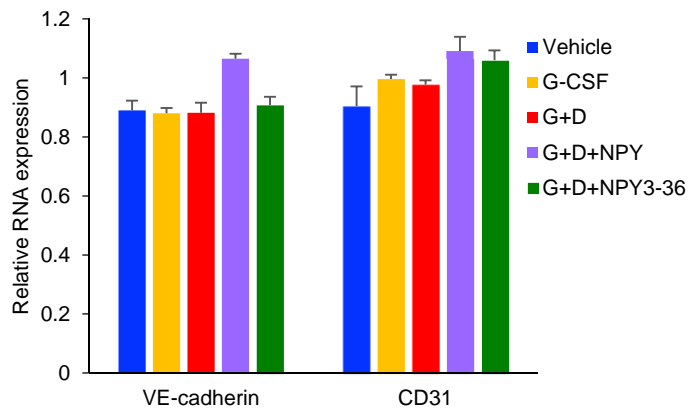

Supplemental  
Figure 6

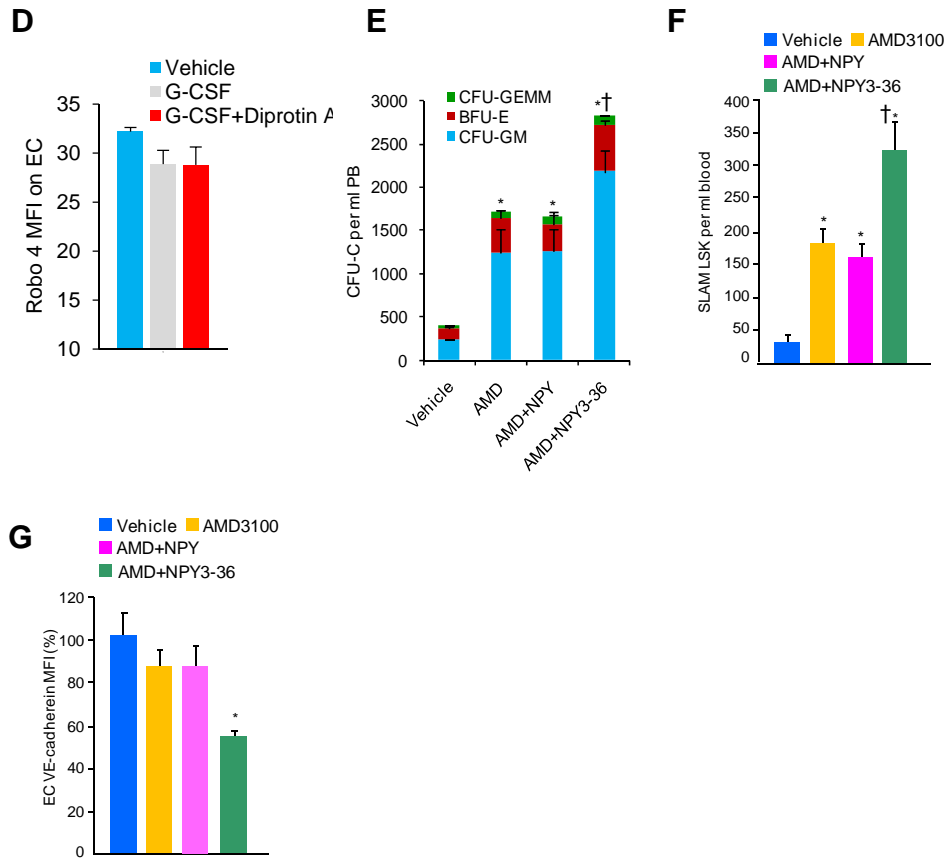



## Supplementary Figure Legends

### Figure S1. HSPC mobilization and CD26 expression measurement

(A) CFU and (B) SLAM LSK cell numbers in PB of G-CSF mobilized wild-type control mice, CD26<sup>-/-</sup> mice and diprotin A treated mice ( $X \pm SEM$ ; N= 5 mice/group, each assayed individually). (C) Competitive transplantation using equal volumes of PB from G-CSF or G-CSF plus diprotin A (CD45.2 C57BL/6) treated mice in combination with  $2 \times 10^5$  BM competitor cells from CD45.1 BoyJ mice. PB donor chimerism was measured by flow cytometry at 6 months after transplantation ( $X \pm SEM$ ; N= 5 mice/group, each assayed individually). (D) Flow cytometry analysis of CD26 expression on BM LSK and SLAM LSK of mice treated with G-CSF ( $X \pm SEM$ ; N= 2 independent experiments, N=4 mice/group).  $p < 0.05$  compared to G-CSF treated WT mice using 1-way ANOVA with Sidak's multiple comparisons test (A-C) or Student T-test (D).

### Figure S2. Hematopoietic stem cell retention factors and CD26 expression/activity in BMEF of G-CSF and G-CSF plus diprotin A treated mice

(A) Representative flow cytometry plots showing intracellular SDF-1 expression in mouse BM nestin<sup>+</sup> MSCs (left) and leptin receptor<sup>+</sup> mesenchymal stromal cells (right). (B, C & D) Mice were treated with G-CSF alone or with diprotin A and OPG, SCF and MMP-9 levels in BMEF were measured by ELISA ( $X \pm SEM$  of at least four mice/group each assayed individually). (E) Flow cytometry analysis of CD26 expression on BM nestin<sup>+</sup> MSCs of vehicle, G-CSF and G-CSF plus diprotin A treated mice ( $X \pm SEM$ ; N= 4 mice/group). (F) Effect of G-CSF treatment on stromal cells (CD45<sup>-</sup>Ter119<sup>-</sup>CD31<sup>-</sup>) DPP IV activity ( $X \pm SEM$ ; N= 4 mice/group).  $p < 0.05$  compared to vehicle using 1-way ANOVA with Sidak's multiple comparisons test (B-E) or Student T-test (F).

### **Figure S3. G-CSF receptor expression on mouse BM endothelial cells**

G-CSF receptor mRNA and protein expression on (A) BM total ECs and (B) sinusoidal ECs. BM total EC and sinusoidal ECs were sorted by FACS. G-CSF receptor mRNA expression in these cell populations were quantitated by QRT-PCR. G-CSF receptor protein expression on the cell surface of BM ECs was determined by flow cytometry ( $X \pm SEM$ ; N= 4 mice/group).

### **Figure S4. NPY and NPY receptors expression on bone marrow cells**

Intracellular NPY expression in (A) bone marrow Gr-1<sup>+</sup>M-CSFR<sup>+</sup>F4/80<sup>int</sup> monocytes/macrophages, nestin<sup>+</sup> MSCs, and CD45<sup>-</sup>Ter119<sup>-</sup>CD31<sup>-</sup> stromal cells in response to G-CSF treatment ( $X \pm SEM$  of  $\geq 4$  mice/group). (B) Representative flow cytometry plots for NPY1, NPY2 and NPY5 receptors expression on mouse BM sinusoidal ECs.  $p < 0.05$  compared to vehicle using Student T-test.

### **Figure S5. Effect of cleaved NPY on HSPCs trafficking**

(A) HPC mobilization in WT mice treated with G-CSF alone, G-CSF plus diprotin A and G-CSF, diprotin A plus NPY<sub>3-36</sub>. HPC mobilization was determined by CFU-C assay ( $X \pm SEM$ ; N= 4 mice/group, each assayed individually). (B) HPC mobilization in response to NPY or NPY<sub>3-36</sub> treatment ( $X \pm SEM$ ; N= 4 mice/group, assayed individually). (C) SLAM LSK in BM of WT and NPY<sup>-/-</sup> mice treated with G-CSF, G-CSF plus diprotin A, and G-CSF plus diprotin A with NPY<sub>3-36</sub> ( $X \pm SEM$ ; N= 4 mice/group, assayed individually). (D) Intravital 2-photon image analysis of the vessels diameter in isolectin B4 labeled evaluable vessels in BM from control and G-CSF treated mice ( $X \pm SEM$ ; N= 4 mice/group, minimum 15 vessels). \*  $p < 0.05$  compared to vehicle and †  $p < 0.05$  compare to G-CSF using 1-way ANOVA with Sidak's multiple comparisons test (A&B) or Student T-test (D).

**Figure S6. Endothelial cell junction proteins expression and HSPC mobilization in response to AMD3100**

(A) Left: Representative immunofluorescence images showing CD31 expression on cell junctions of HUVEC without or with dapi staining. HUVEC were treated with G-CSF, G-CSF plus diprotin A, G-CSF plus diprotin A with NPY or with NPY<sub>3-36</sub> (magnification 200X). Middle: VE-cadherin expression on cell junctions of HUVEC without or with dapi staining. Cells were treated as described above (magnification 200X). Right: Bar graphs showing average values for CD31 (upper), and VE-cadherin (lower) at HUVEC junctions (images were evaluated in triplicate samples for 5 areas/ sample). (B) Left: Representative confocal image of HUVEC showing total (red) and intracellular (cytoplasmic) VE-cadherin expression (MFI) (scale bar: 10 um) . Right: Average of internalized VE-cadherin in HUVEC after G-CSF or G-CSF plus diprotin A or G-CSF plus diprotin A with NPY<sub>3-36</sub> treatment ( $X \pm SEM$ ; N= minimum 3 focus area/treatment). (C) Expression of VE-cadherin and CD31 transcripts in EC in response to G-CSF, G-CSF plus diprotin and G-CSF plus diprotin A with NPY or NPY<sub>3-36</sub> ( $X \pm SEM$ ; N=3 experiment/group). (D) Robo4 expression on BM EC from mice treated with G-CSF or G-CSF plus diprotin A ( $X \pm SEM$ ; N=4 mice/group). (E&F) CFU-Cs and SLAM LSK mobilization in response to AMD3100 or AMD3100 plus NPY or AMD3100 plus NPY<sub>3-36</sub> ( $X \pm SEM$ ; N= 4 mice/group, each assayed individually). (G) VE-cadherin expression on BM SECs of mice treated with AMD3100 or AMD3100 plus NPY or AMD3100 plus NPY<sub>3-36</sub> ( $X \pm SEM$ ; N= 4 mice/group, each assayed individually). \*  $p < 0.05$  compared to vehicle and †  $p < 0.05$  compare to G-CSF/AMD3100 using 1-way ANOVA with Sidak's multiple comparisons test.
